# Supplementary material for: Mapping the structure–activity landscape of non-canonical peptides with MAP4 fingerprinting
Source: Royal Society of Chemistry journal article supplement (doi:10.1039/d3dd00098b), 2023-01-01
Supplement: d3dd00098b1.pdf [file d3dd00098b1.pdf]

## Mapping the structure-activity landscape of non-canonical peptides with MAP4 fingerprinting

Edgar López-López<sup>1,2,\*</sup>, Oscar Robles<sup>3</sup>, Fabien Plisson<sup>4</sup> and José L. Medina-Franco<sup>1\*</sup>

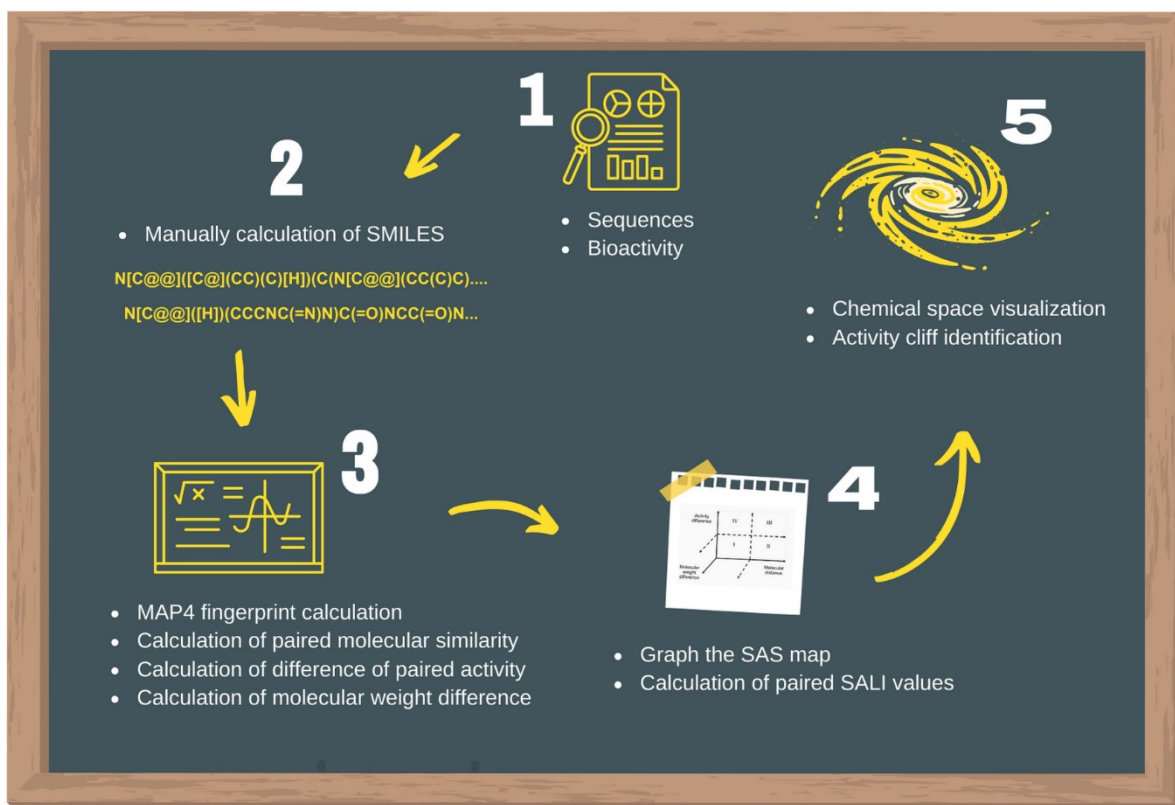

**Figure S1.** Overview step by step of the protocol implemented in this work.

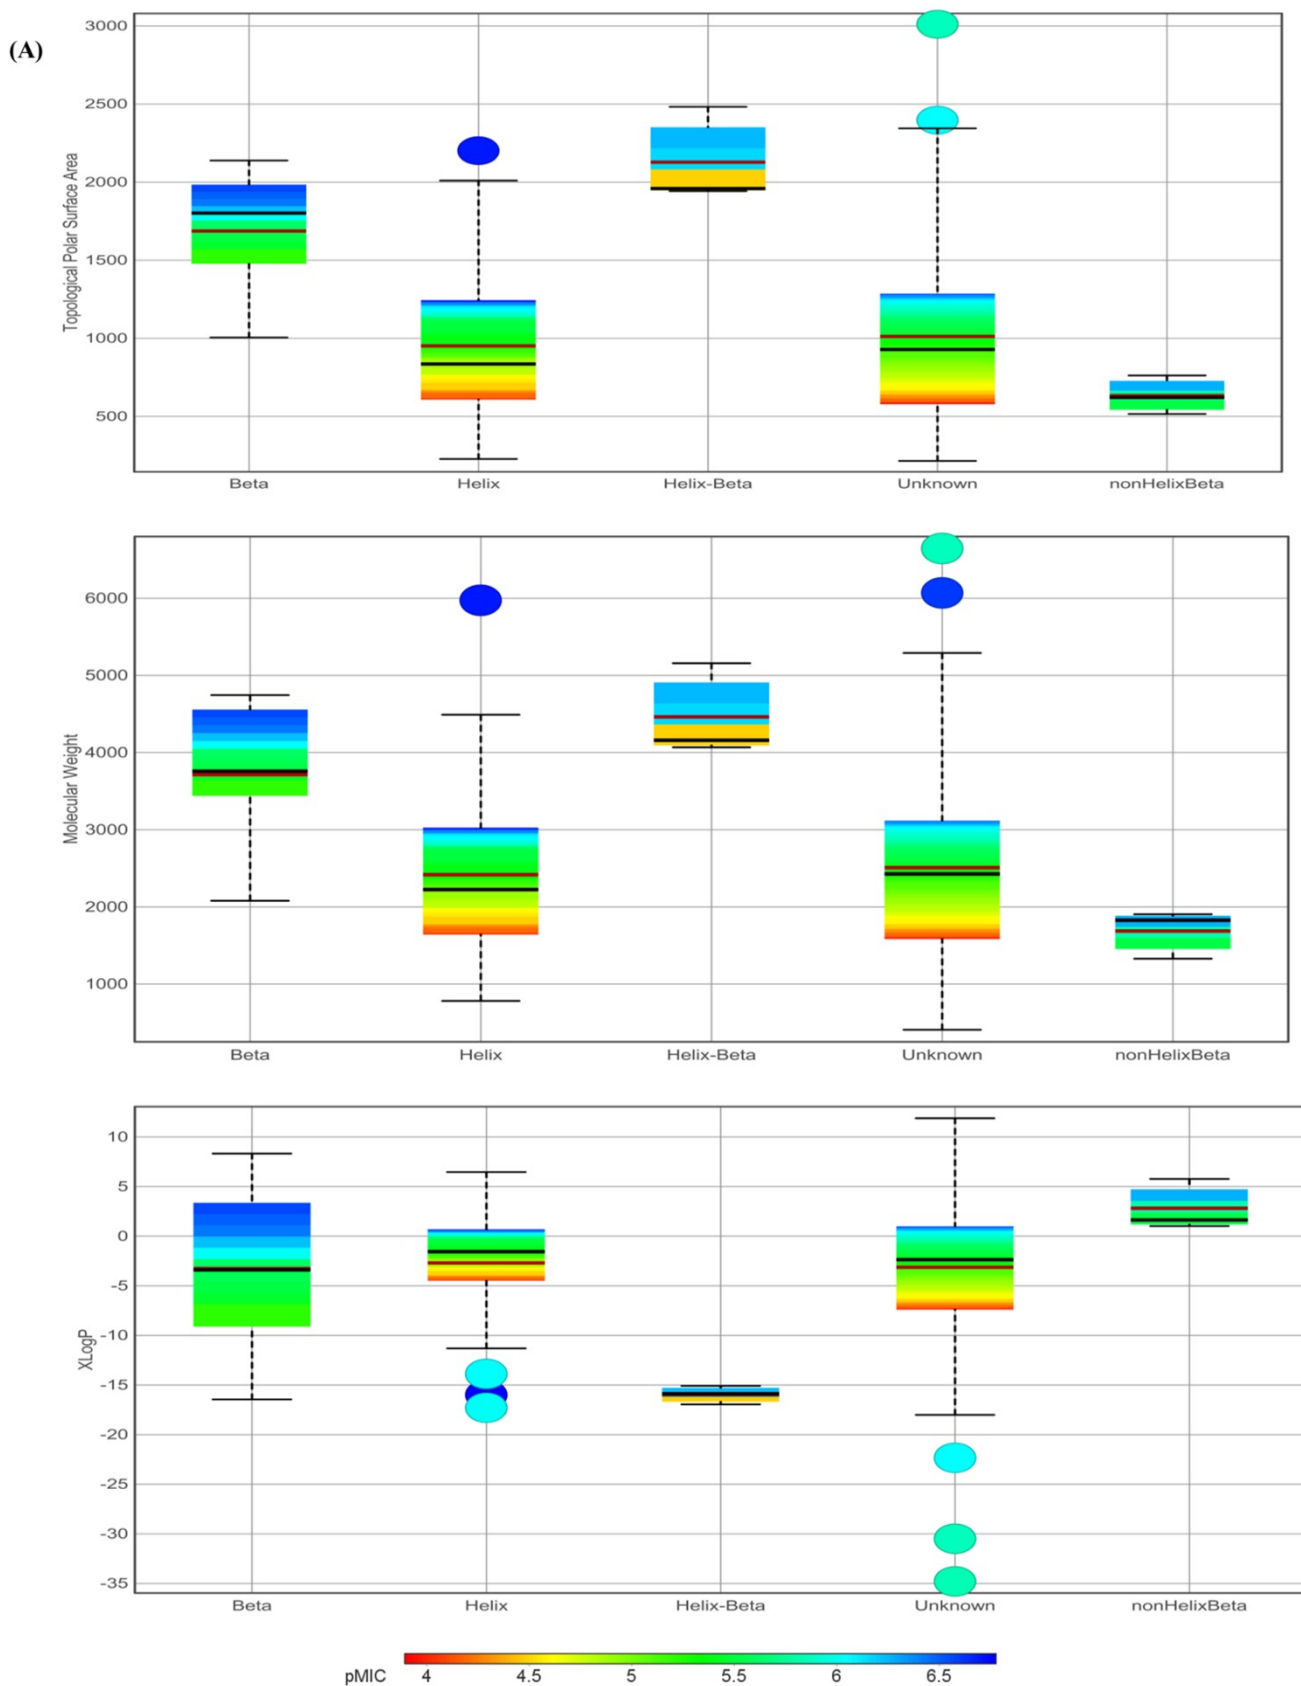

(B)

| Descriptors | 1 | 2      | 3      | 4       |
|-------------|---|--------|--------|---------|
| MW          | 1 | 0.981  | -0.642 | 0.346   |
| TPSA        | 2 | 0.981  | -0.733 | 0.327   |
| XLogP       | 3 | -0.642 | -0.733 | -0.0817 |
| pMIC        | 4 | 0.346  | 0.327  | -0.0817 |

**Figure S2.** Property diversity of the anti-MRSA peptide dataset used in this work. Properties calculated with KNIME-CDK node. The red and black lines denote the mean and median distributions, respectively. The data points outside of the boxes indicate outliers.



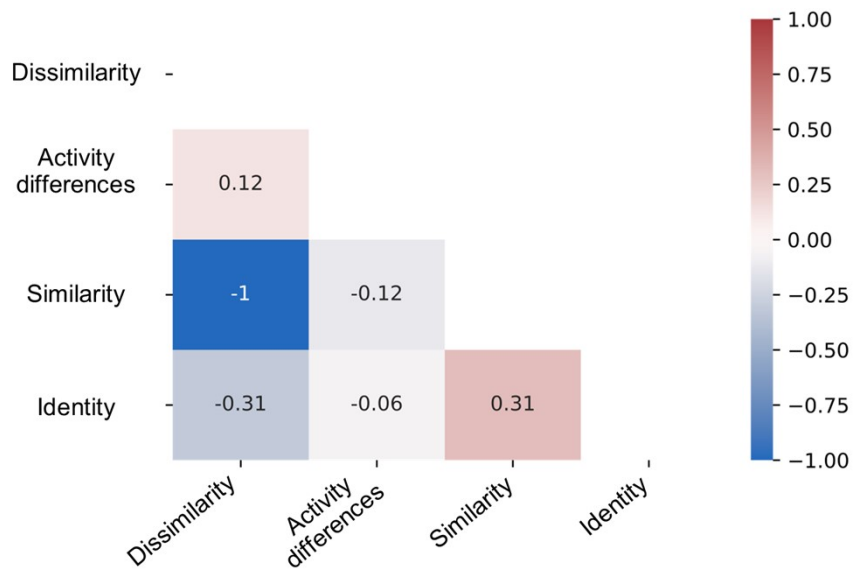

Figure S4. Correlations of identity values and fingerprint-based similarity values.

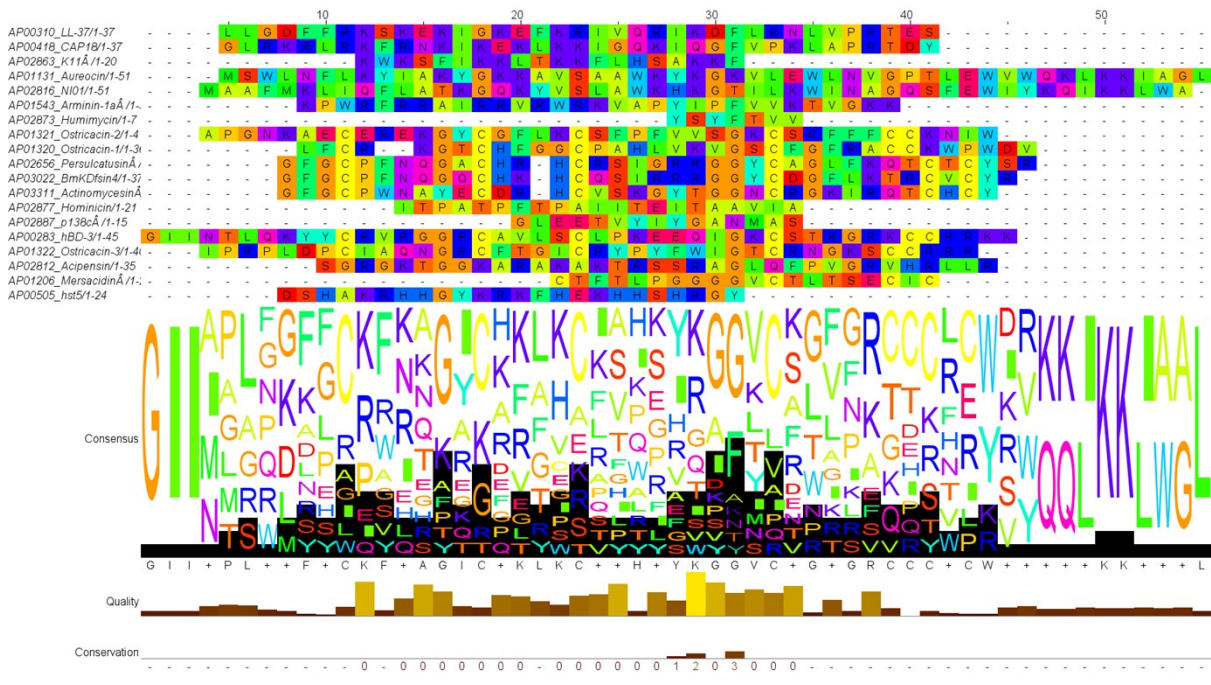

Figure S5. Alignment analysis of the 20 most potent anti-MRSA peptides.
